# Supplementary material
Source: Springer Nature journal article supplement (https://www.springermedizin.de/resource/supplementary/12968_2009_528_MOESM1_ESM.pdf/9579180)

**A**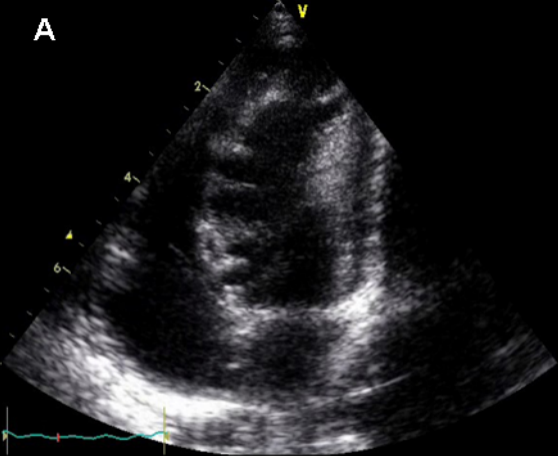**End Diastole****B**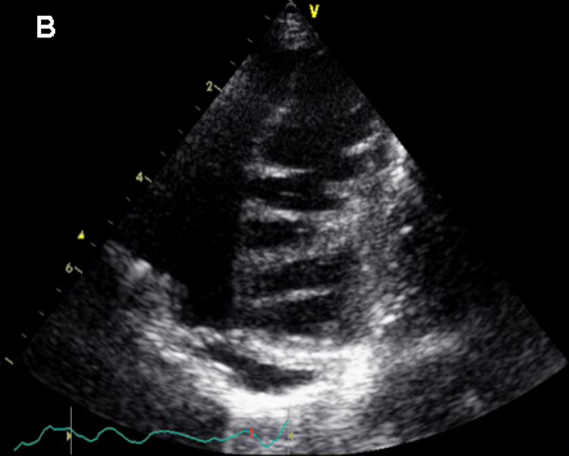**End Systole**

Supplement: MOESM1 [file 9579180]
